# Supplementary material for: Large genotype–phenotype study in carriers of D4Z4 borderline alleles provides guidance for facioscapulohumeral muscular dystrophy diagnosis
Source: PubMed Central journal article supplement (PMC7730397; doi:10.1038/s41598-020-78578-7), 2020-12-10

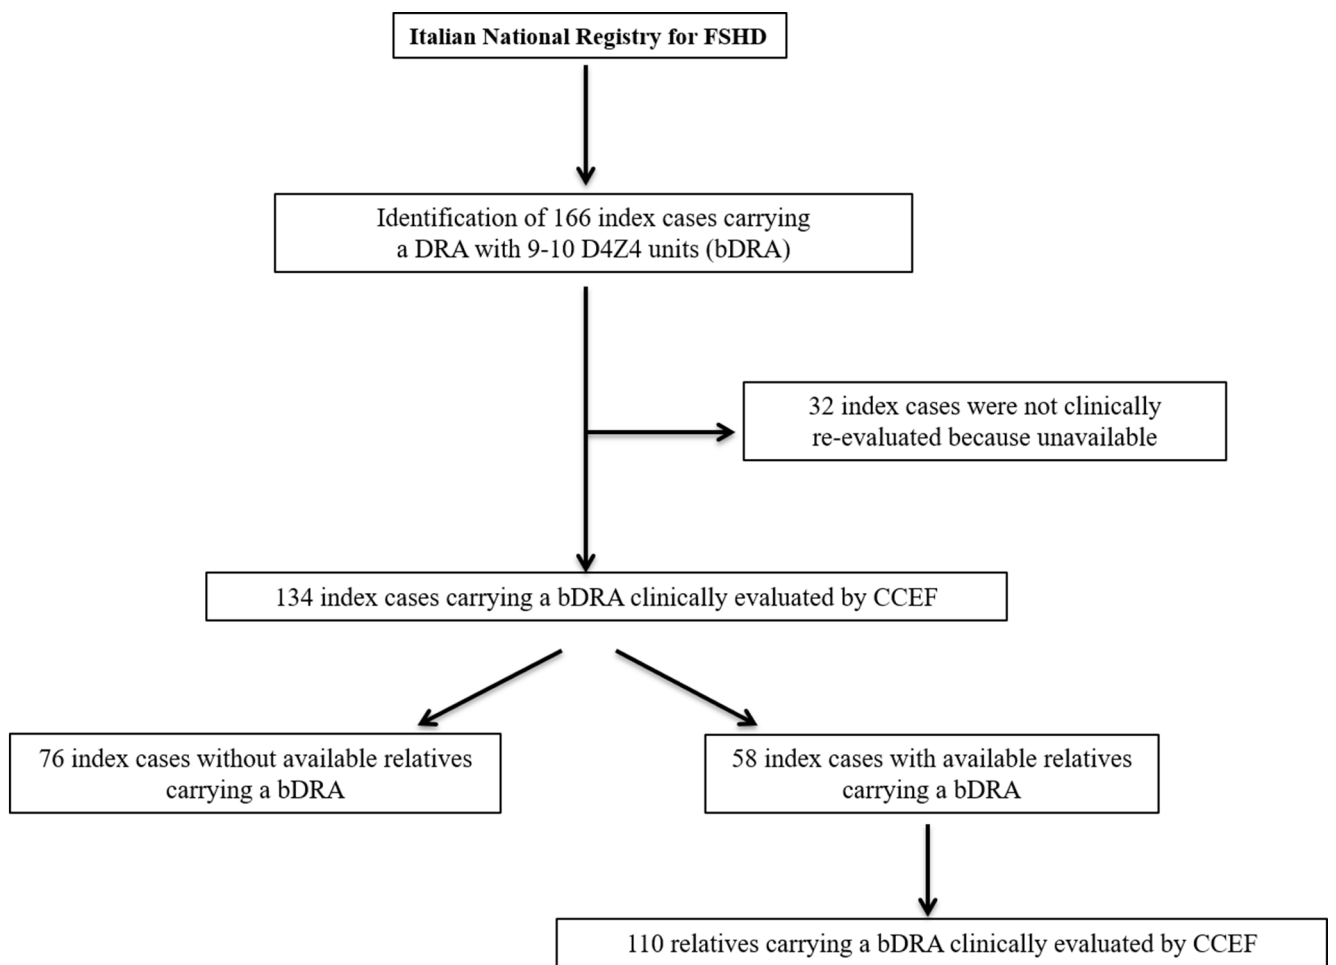

Supplement: 41598_2020_78578_MOESM2_ESM.pdf [file 41598_2020_78578_MOESM2_ESM.pdf]
